# Supplementary material for: The synthetic glucocorticoids prednisolone and dexamethasone regulate the same genes in acute lymphoblastic leukemia cells
Source: Springer Nature journal article supplement (doi:10.1186/1471-2164-15-662), 2014-08-07
Supplement: 12864_2014_6349_MOESM1_ESM.pdf [file 12864_2014_6349_MOESM1_ESM.pdf]

## Supplementary Information for

# The synthetic glucocorticoids prednisolone and dexamethasone regulate the same genes in acute lymphoblastic leukemia cells

Daniel Bindreither<sup>1,4</sup>, Simone Ecker<sup>2,3,4</sup>, Barbara Gschirr<sup>1,3</sup>, Anita Kofler<sup>1,3</sup>, Reinhard Kofler<sup>1,3</sup> and Johannes Rainer<sup>1,3,\*</sup>

<sup>1</sup> Division of Molecular Pathophysiology, Biocenter, Medical University Innsbruck, Innrain 80-82, 6020 Innsbruck, Austria.

<sup>2</sup> Structural Biology and Biocomputing Program, Spanish National Cancer Research Center (CNIO), Madrid, Spain.

<sup>3</sup> Tyrolean Cancer Research Institute, Innrain 66, 6020 Innsbruck, Austria.

<sup>4</sup> Contributed equally to this work.

\* Corresponding author: Johannes Rainer, johannes.rainer@i-med.ac.at

# Contents

|                                                   |          |
|---------------------------------------------------|----------|
| <b>GC-bioactivity and apoptosis induction</b>     | <b>1</b> |
| Supplementary Figure S1. . . . .                  | 1        |
| Supplementary Figure S2. . . . .                  | 2        |
| Supplementary Figure S3. . . . .                  | 2        |
| <b>Comparison of transcriptional responses</b>    | <b>3</b> |
| <b>Correlation of M-values</b> . . . . .          | 3        |
| Supplementary Figure S4. . . . .                  | 3        |
| <b>Comparison of GC-regulated genes</b> . . . . . | 3        |
| Supplementary Figure S5. . . . .                  | 3        |
| Supplementary Figure S6. . . . .                  | 4        |
| Supplementary Figure S7. . . . .                  | 5        |
| Supplementary Table S1. . . . .                   | 7        |
| Supplementary Table S2. . . . .                   | 11       |
| Supplementary Table S3. . . . .                   | 11       |
| Supplementary Table S4. . . . .                   | 12       |
| Supplementary Table S5. . . . .                   | 12       |

## GC-bioactivity and apoptosis induction

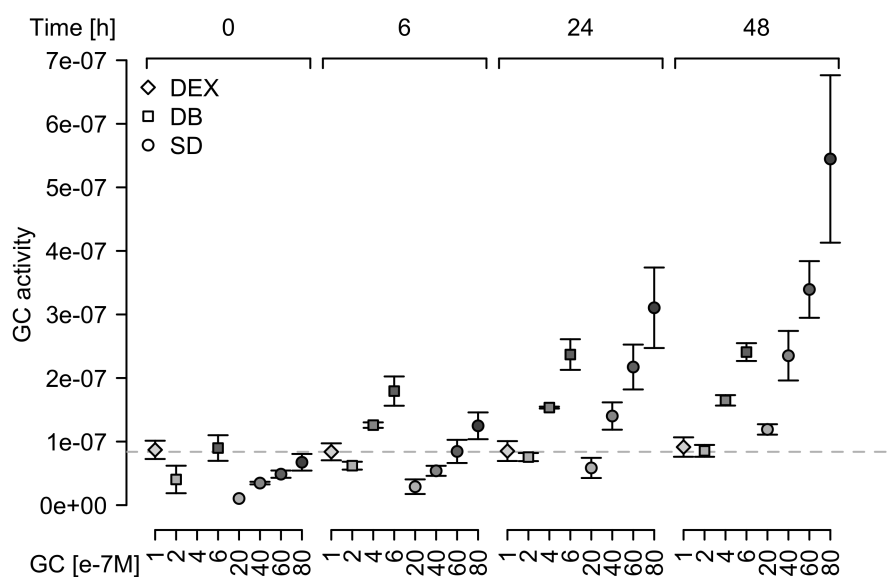

**Supplementary Figure S1:** Active GC-concentrations measured with the GC-bioactivity assay [1] in cell supernatants of dexamethasone (DEX, diamonds), Dexabene (DB, rectangles) and Solu-dacortin (SD, circles) treated C7H2 cells for the indicated time points and concentrations. Shown are mean and standard deviations from 3 independent experiments.

Our GC-bioactivity results reconfirmed the PRED:DEX dosage ratio of 7:1 that is being used in most clinical trials [2]. This dosage ratio was however only valid for the completely active form of the synthetic GCs (i.e. dexamethasone and prednisolone), as GC-bioactivity measurements of the water soluble variants Solu-dacortin [prednisolone 21-(sodium succinate)] and Dexabene [dexamethasone 21-(disodium phosphate)] yielded much higher differences in activity at early time points (60-fold higher concentration of Solu-dacortin resulted in a similar activity than 1.0e-7M DEX after 6 hours treatment while the difference in activity between DEX and Dexabene was 3-fold; supplementary Figure S1). In contrast to the active form of the synthetic GC Dexamethasone (DEX), which activity levels remain unchanged for the investigated time frame, both water soluble forms show increasing activity levels over treatment time (see Figure S1). Even more importantly, both water-soluble GCs showed different activity kinetics (supplementary Figure S1). The activation of these GC-variants might be much faster *in vivo* due to the higher availability of the enzymes required to activate the synthetic GC, thus, whether such differences would also be observed *in vivo* remains to be determined. The above described differences in activity kinetics renders these two water soluble GCs however incomparable in *in vitro* studies why we have opted to use the already active, ethanol soluble, dexamethasone and prednisolone instead. Also, the above described activation kinetics might explain the higher PRED:DEX ratios determined in other *in vitro* studies [3][4].

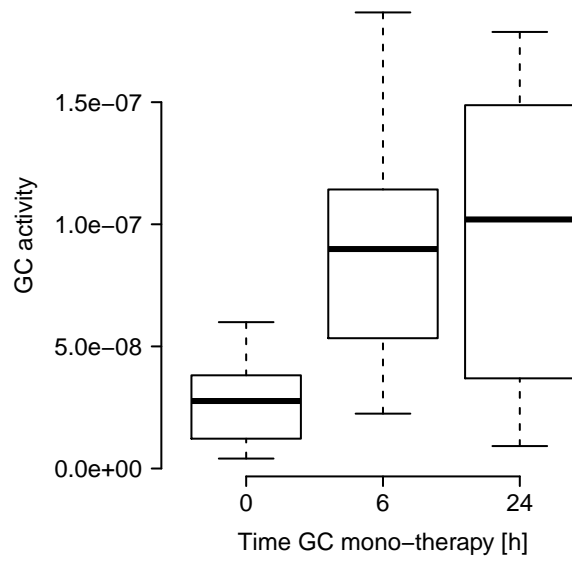

**Supplementary Figure S2:** Active GC levels (represented as dexamethasone equivalent concentration) measured in serum samples of 8 childhood B-ALL patients prior to and during systemic GC mono-therapy.

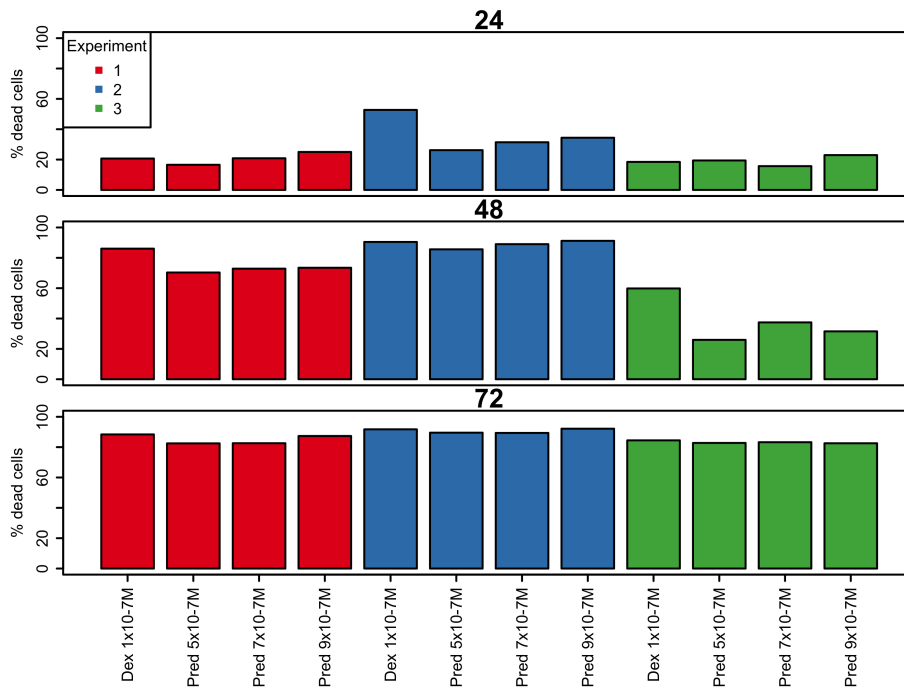

**Supplementary Figure S3:** Percentages of apoptotic and necrotic cells due to treatment with either dexamethasone (DEX) or prednisolone (PRED) in the indicated concentrations for each of the 3 experiments. Upper, middle and lower panel show the data after 24, 48 and 72 hours of treatment, respectively.

# Comparison of transcriptional responses

## Correlation of M-values

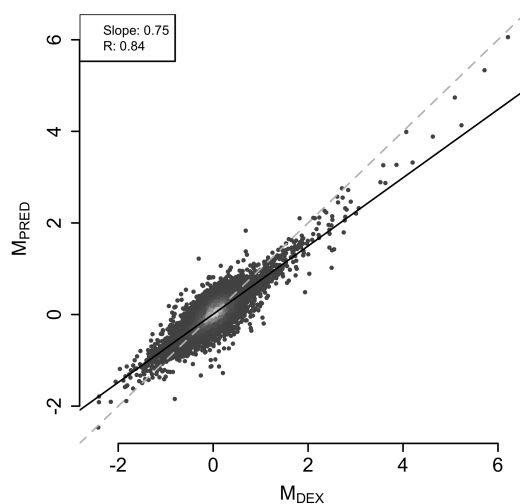

**Supplementary Figure S4:** Correlation of M-values (log2 fold change values) representing GC-regulation of the genes due to DEX (x-axis) or PRED (y-axis). The dashed grey line corresponds to the identity line, the black solid line the linear regression fit to the data cloud.

## Comparison of GC-regulated genes

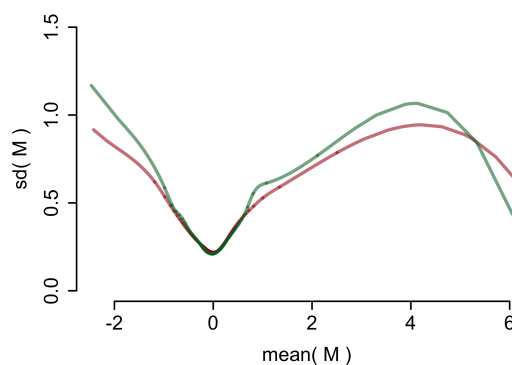

**Supplementary Figure S5:** Average gene regulations (x-axis) against variance of regulations (y-axis) for DEX (red line) and PRED (green line) treated samples (average and standard deviation across 3 replicates).

For both up- and down-regulated genes the inter-replicate variance is larger for the PRED treated samples (see Figure S5 above). This, in combination with the overall slightly lower extent of regulation (see Figure S4), results in lower significance levels and thus less significantly regulated genes identified for PRED treatment.

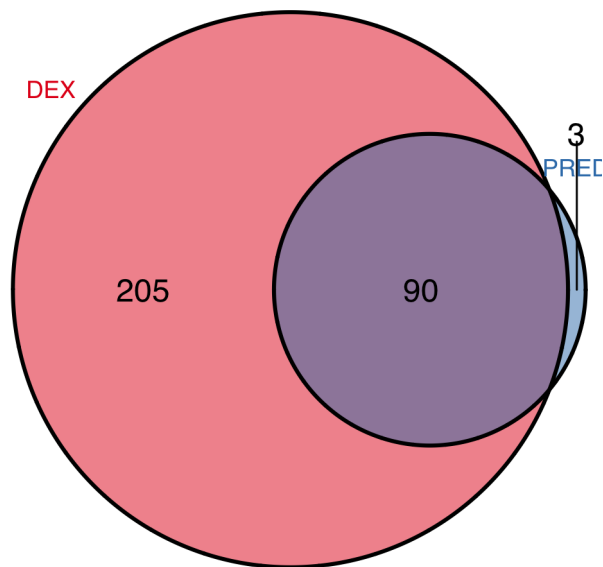

**Supplementary Figure S6:** Comparison of genes found significantly regulated by PRED or DEX treatment.

Comparison of genes found to be significantly regulated ( $p_{BH} < 0.05$  and  $|M| > 1$ ) by either PRED or DEX treatment. All of the significant PRED-regulated genes were also significantly regulated by DEX, 3 of them however being slightly below the M-value cut-off in DEX treatment (highlighted blue in Table S1). Also, most of the genes found significantly regulated only by DEX were just below the p-value, M-value or both cut-offs. Specifically, of the 205 genes found significantly regulated only by DEX, 80 passed the M-value but not the p-value cut-off in PRED treated samples (highlighted green in Table S1) and 12 did not reach the regulation cut-off while passing the significance cut-off (highlighted blue in Table S1). Also, 92 of the remaining 113 genes were, with an M-value between 0.7 and 1, just below the cut-off for regulation in PRED treatment. The remaining 21 genes are shown in Table S3.

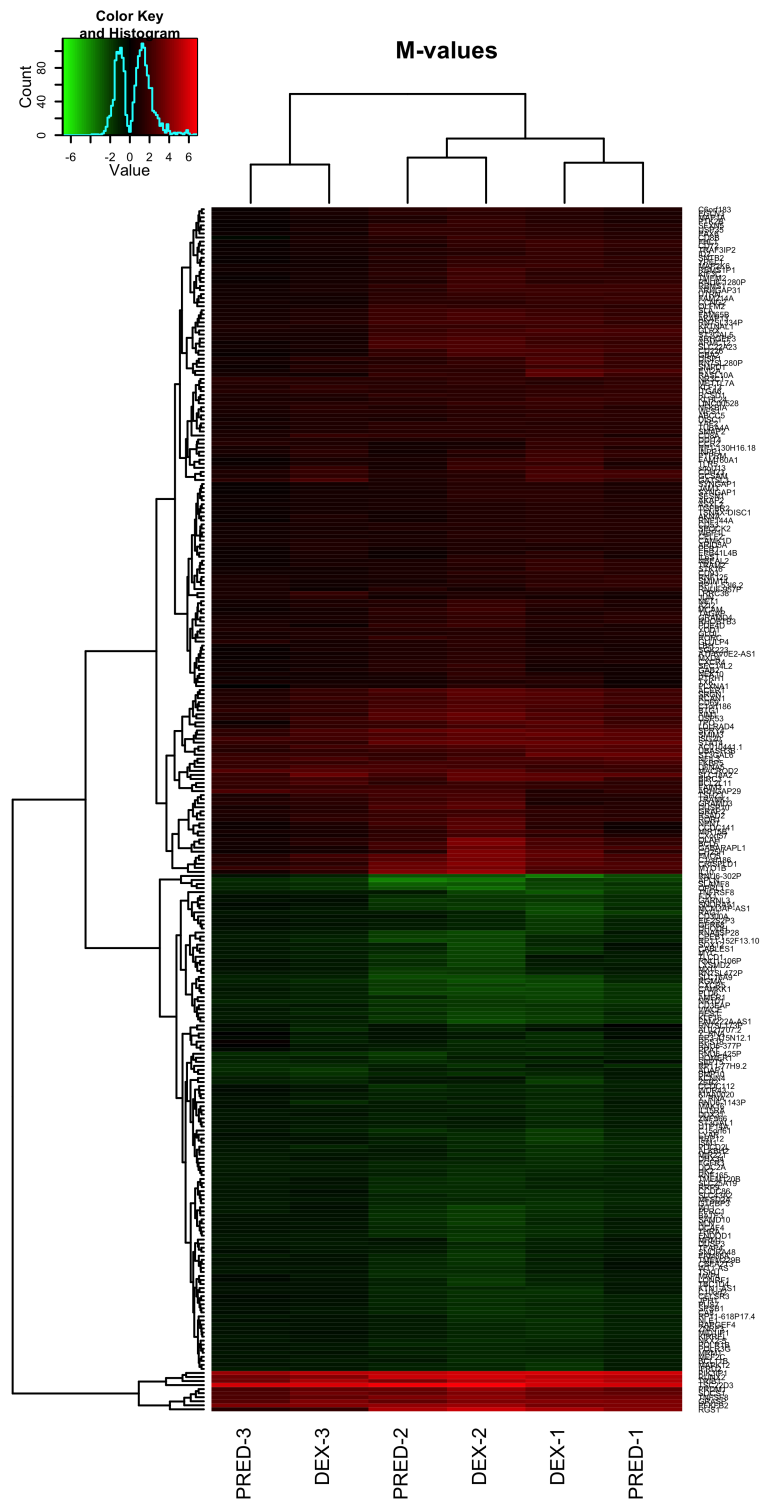

**Supplementary Figure S7:** Heatmap on the per-experiment M-values of genes significantly regulated by DEX and/or PRED.

| Probe set ID      | Gene name   | No. probes | Gene biotype   | $p_{BH.D}$ | $M.D$ | $p_{BH.P}$ | $M.P$ | $M.PvsD$ | GBR |
|-------------------|-------------|------------|----------------|------------|-------|------------|-------|----------|-----|
| 74ENST00000372382 | TSC22D3     | 14         | protein_coding | 2.0e-05    | 6.21  | 2.4e-05    | 6.06  | -0.15    | YY  |
| 74ENST00000215912 | PIK3IP1     | 23         | protein_coding | 4.2e-05    | 5.72  | 4.9e-05    | 5.34  | -0.38    | Y-  |
| 74ENST00000371432 | RUNX2       | 18         | protein_coding | 7.2e-04    | 5.09  | 1.4e-03    | 4.74  | -0.35    | -   |
| 74ENST00000519576 | TRIB1       | 10         | protein_coding | 1.7e-04    | 5.23  | 7.4e-04    | 4.13  | -1.10    | YY  |
| 74ENST00000411990 | PFKFB2      | 14         | protein_coding | 4.2e-05    | 4.07  | 4.9e-05    | 3.99  | -0.08    | YY  |
| 74ENST00000546756 | GRASP       | 15         | protein_coding | 1.7e-04    | 3.86  | 6.6e-04    | 3.27  | -0.59    | YY  |
| 74ENST00000223795 | TNFSF8      | 30         | protein_coding | 3.9e-04    | 3.58  | 7.4e-04    | 3.26  | -0.32    | YY  |
| 74ENST00000332029 | SOCS1       | 16         | protein_coding | 1.3e-04    | 3.52  | 6.0e-04    | 2.89  | -0.63    | YY  |
| 74ENST00000369096 | PRDM1       | 30         | protein_coding | 3.3e-04    | 3.63  | 1.2e-03    | 2.87  | -0.76    | YY  |
| 74ENST00000392320 | STAT4       | 24         | protein_coding | 6.1e-03    | 2.71  | 9.5e-03    | 2.76  | 0.04     | -   |
| 74ENST00000560741 | ISG20       | 9          | protein_coding | 3.3e-04    | 2.61  | 6.0e-04    | 2.57  | -0.04    | YY  |
| 74ENST00000392316 | MYO1B       | 31         | protein_coding | 6.5e-03    | 2.73  | 1.6e-02    | 2.55  | -0.18    | -   |
| 74ENST00000427399 | APLN        | 12         | protein_coding | 2.0e-02    | -2.42 | 4.3e-02    | -2.47 | -0.05    | YY  |
| 74ENST00000344120 | SPRY4       | 29         | protein_coding | 1.7e-03    | 2.90  | 6.6e-03    | 2.46  | -0.43    | -   |
| 74ENST00000402914 | MACROD2     | 21         | protein_coding | 4.2e-04    | 2.63  | 7.4e-04    | 2.45  | -0.18    | -   |
| 74ENST00000298472 | SLC18A2     | 32         | protein_coding | 7.2e-04    | 3.07  | 5.2e-03    | 2.32  | -0.74    | -   |
| 74ENST00000526627 | SMIM3       | 27         | protein_coding | 1.8e-03    | 2.78  | 8.0e-03    | 2.32  | -0.46    | -   |
| 74ENST00000460774 | ST3GAL6     | 13         | protein_coding | 1.1e-02    | 2.35  | 2.4e-02    | 2.26  | -0.08    | Y-  |
| 74ENST00000297689 | NFIL3       | 25         | protein_coding | 7.2e-04    | 2.38  | 1.4e-03    | 2.23  | -0.15    | -   |
| 74ENST00000533174 | FMO5        | 9          | protein_coding | 3.3e-03    | 3.01  | 2.1e-02    | 2.21  | -0.80    | -   |
| 74ENST00000600109 | AC010441.1  | 23         | protein_coding | 1.7e-03    | 2.51  | 6.1e-03    | 2.15  | -0.36    | -   |
| 74ENST00000256015 | BTG1        | 22         | protein_coding | 1.7e-03    | 2.24  | 3.5e-03    | 2.12  | -0.12    | -   |
| 74ENST00000542713 | FKBP5       | 17         | protein_coding | 5.4e-04    | 2.11  | 7.4e-04    | 2.11  | 0.00     | YY  |
| 74ENST00000446822 | DFNA5       | 10         | protein_coding | 1.4e-03    | 2.14  | 2.2e-03    | 2.10  | -0.04    | -   |
| 74ENST00000370217 | ARHGAP29    | 13         | protein_coding | 9.7e-03    | 1.82  | 9.1e-03    | 2.10  | 0.28     | -   |
| 74ENST00000535438 | AIM1        | 15         | protein_coding | 1.1e-02    | 2.51  | 4.5e-02    | 2.07  | -0.44    | YY  |
| 74ENST00000603378 | C1orf186    | 12         | protein_coding | 6.1e-03    | 2.77  | 4.2e-02    | 2.05  | -0.72    | -   |
| 74ENST00000284273 | UBASH3B     | 46         | protein_coding | 5.8e-03    | 2.23  | 1.6e-02    | 1.99  | -0.24    | -   |
| 74ENST00000301452 | ACER1       | 31         | protein_coding | 3.9e-03    | 2.43  | 1.7e-02    | 1.96  | -0.47    | -   |
| 74ENST00000274030 | USP53       | 36         | protein_coding | 4.1e-03    | 2.49  | 2.1e-02    | 1.95  | -0.55    | -   |
| 74ENST00000355631 | OPRL1       | 24         | protein_coding | 7.3e-03    | -2.41 | 3.8e-02    | -1.91 | 0.49     | -   |
| 74ENST00000368104 | SLAMF8      | 15         | protein_coding | 1.2e-02    | -2.16 | 4.2e-02    | -1.91 | 0.25     | Y-  |
| 74ENST00000228434 | CD69        | 28         | protein_coding | 4.1e-03    | 2.18  | 1.4e-02    | 1.87  | -0.31    | YY  |
| 74ENST00000399272 | RCAN1       | 14         | protein_coding | 9.9e-04    | 2.45  | 7.2e-03    | 1.85  | -0.60    | YY  |
| 74ENST00000263464 | BIRC3       | 34         | protein_coding | 5.6e-04    | 2.75  | 8.0e-03    | 1.79  | -0.96    | YY  |
| 74ENST00000242465 | SRGN        | 22         | protein_coding | 4.2e-03    | 2.45  | 3.3e-02    | 1.76  | -0.69    | -   |
| 74ENST00000331555 | C1orf186    | 23         | protein_coding | 1.8e-03    | 2.22  | 9.5e-03    | 1.74  | -0.49    | -   |
| 74ENST00000529560 | FAIM3       | 10         | protein_coding | 5.4e-04    | 1.87  | 1.1e-03    | 1.72  | -0.15    | YY  |
| 74ENST00000380615 | KATNAL1     | 33         | protein_coding | 1.1e-02    | 1.59  | 1.8e-02    | 1.65  | 0.05     | Y-  |
| 74ENST00000586222 | LDLRAD4     | 10         | protein_coding | 4.1e-03    | 2.09  | 2.1e-02    | 1.63  | -0.45    | YY  |
| 74ENST00000246672 | NR1D1       | 30         | protein_coding | 3.0e-03    | -1.69 | 6.1e-03    | -1.62 | 0.07     | -   |
| 74ENST00000405953 | BCL2L11     | 15         | protein_coding | 9.5e-04    | 2.00  | 5.0e-03    | 1.61  | -0.39    | -   |
| 74ENST00000465067 | RN7SL334P   | 16         | misc_RNA       | 1.3e-02    | 1.84  | 4.3e-02    | 1.58  | -0.25    | -   |
| 74ENST00000321560 | PLD6        | 30         | protein_coding | 1.1e-02    | -1.83 | 4.3e-02    | -1.56 | 0.26     | -   |
| 74ENST00000416954 | NR3C1       | 17         | protein_coding | 9.5e-04    | 1.54  | 1.2e-03    | 1.55  | 0.02     | -   |
| 74ENST00000371080 | ROR1        | 20         | protein_coding | 8.6e-03    | 1.97  | 4.3e-02    | 1.55  | -0.43    | -   |
| 74ENST00000292174 | CXCR5       | 22         | protein_coding | 1.1e-02    | -1.81 | 4.2e-02    | -1.55 | 0.26     | Y-  |
| 74ENST00000427060 | SLA         | 23         | protein_coding | 1.1e-02    | 1.81  | 4.3e-02    | 1.53  | -0.28    | YY  |
| 74ENST00000383877 | RNU6-425P   | 24         | snRNA          | 1.4e-02    | -1.50 | 2.7e-02    | -1.50 | -0.00    | -   |
| 74ENST00000378023 | FAM65B      | 18         | protein_coding | 9.7e-03    | 1.83  | 4.3e-02    | 1.49  | -0.35    | -   |
| 74ENST00000554387 | RGMA        | 18         | protein_coding | 5.3e-03    | -2.05 | 4.3e-02    | -1.47 | 0.59     | -   |
| 74ENST00000398788 | CDH23       | 22         | protein_coding | 8.6e-03    | 1.83  | 4.2e-02    | 1.47  | -0.36    | -   |
| 74ENST00000537350 | RCSD1       | 17         | protein_coding | 8.6e-03    | 1.44  | 1.5e-02    | 1.46  | 0.02     | Y-  |
| 74ENST00000399090 | GRAP2       | 15         | protein_coding | 4.9e-03    | 1.65  | 1.5e-02    | 1.46  | -0.19    | YY  |
| 74ENST00000307145 | KLF13       | 28         | protein_coding | 3.3e-03    | 1.58  | 8.2e-03    | 1.44  | -0.14    | -   |
| 74ENST00000428977 | TRANK1      | 25         | protein_coding | 1.1e-02    | 1.67  | 4.3e-02    | 1.41  | -0.27    | -   |
| 74ENST00000442250 | ITGA6       | 28         | protein_coding | 1.7e-03    | 1.53  | 4.9e-03    | 1.41  | -0.12    | YY  |
| 74ENST00000548553 | METTL7A     | 30         | protein_coding | 3.9e-03    | 1.47  | 8.0e-03    | 1.40  | -0.07    | YY  |
| 74ENST00000565934 | RP11-77H9.2 | 6          | antisense      | 2.8e-02    | -1.28 | 4.7e-02    | -1.38 | -0.10    | -   |
| 74ENST00000250916 | KLF16       | 27         | protein_coding | 1.1e-02    | -1.74 | 4.9e-02    | -1.38 | 0.37     | -   |
| 74ENST00000509972 | CCNG2       | 14         | protein_coding | 3.0e-02    | 1.25  | 4.9e-02    | 1.35  | 0.10     | -   |
| 74ENST00000600723 | LINC00528   | 24         | lincRNA        | 1.7e-03    | 1.67  | 8.2e-03    | 1.35  | -0.33    | -   |
| 74ENST00000450751 | CPEB1       | 28         | protein_coding | 1.6e-02    | -1.53 | 4.9e-02    | -1.33 | 0.20     | -   |
| 74ENST00000535710 | VWCE        | 9          | protein_coding | 1.0e-02    | -1.61 | 4.3e-02    | -1.32 | 0.29     | -   |
| 74ENST00000541728 | RSAD2       | 17         | protein_coding | 3.9e-03    | 1.70  | 1.9e-02    | 1.32  | -0.38    | Y-  |
| 74ENST00000404953 | GATSL3      | 22         | protein_coding | 3.9e-03    | 2.00  | 4.2e-02    | 1.32  | -0.69    | Y-  |
| 74ENST00000476808 | KLHL24      | 18         | protein_coding | 9.7e-03    | 1.49  | 3.3e-02    | 1.31  | -0.18    | -   |
| 74ENST00000330258 | AMER1       | 36         | protein_coding | 8.1e-03    | -1.77 | 4.8e-02    | -1.31 | 0.46     | -   |
| 74ENST00000535690 | HOMER1      | 13         | protein_coding | 2.5e-02    | -0.91 | 1.5e-02    | -1.25 | -0.35    | Y-  |
| 74ENST00000589804 | CD3EAP      | 22         | protein_coding | 1.4e-02    | -1.47 | 4.8e-02    | -1.25 | 0.22     | -   |
| 74ENST00000307365 | DDIT4       | 30         | protein_coding | 5.8e-03    | 1.32  | 1.3e-02    | 1.25  | -0.07    | -   |
| 74ENST00000412135 | FGFR3       | 21         | protein_coding | 6.1e-03    | -1.19 | 8.3e-03    | -1.24 | -0.05    | -   |
| 74ENST00000503569 | WFS1        | 36         | protein_coding | 3.2e-03    | 1.42  | 9.5e-03    | 1.22  | -0.20    | YY  |
| 74ENST00000442791 | YAF2        | 20         | protein_coding | 4.9e-03    | 1.29  | 1.1e-02    | 1.20  | -0.10    | YY  |
| 74ENST00000540377 | TMEM120B    | 11         | protein_coding | 2.9e-02    | -1.11 | 4.8e-02    | -1.20 | -0.09    | -   |
| 74ENST00000372718 | SMAP2       | 24         | protein_coding | 4.2e-03    | 1.25  | 8.4e-03    | 1.19  | -0.06    | Y-  |
| 74ENST00000408031 | GRAMD4      | 10         | protein_coding | 1.5e-02    | 1.28  | 4.3e-02    | 1.18  | -0.11    | -   |



| Probe set ID      | Gene name | No. probes | Gene biotype   | $p_{BH}.D$ | $M.D$ | $p_{BH}.P$ | $M.P$ | $M.PvsD$ | GBR |
|-------------------|-----------|------------|----------------|------------|-------|------------|-------|----------|-----|
| 74ENST00000217740 | RNF125    | 26         | protein_coding | 2.4e-02    | 1.14  | 4.7e-02    | 1.18  | 0.03     | Y-  |
| 74ENST00000409781 | CD8A      | 14         | protein_coding | 5.3e-03    | 1.68  | 4.7e-02    | 1.15  | -0.54    | YY  |
| 74ENST00000232424 | HES1      | 23         | protein_coding | 3.0e-03    | -1.82 | 4.2e-02    | -1.13 | 0.69     | Y-  |
| 74ENST00000557389 | NFKBIA    | 21         | protein_coding | 1.6e-03    | 1.53  | 1.0e-02    | 1.12  | -0.41    | -   |
| 74ENST00000564357 | DOC2A     | 18         | protein_coding | 5.0e-03    | -1.29 | 1.6e-02    | -1.12 | 0.16     | -   |
| 74ENST00000363652 | RNU6-957P | 7          | snRNA          | 4.1e-02    | 0.86  | 4.2e-02    | 1.11  | 0.25     | -   |
| 74ENST00000367084 | YOD1      | 20         | protein_coding | 5.0e-03    | 1.10  | 8.3e-03    | 1.11  | 0.01     | YY  |
| 74ENST00000295379 | BMP10     | 28         | protein_coding | 3.3e-03    | -1.44 | 1.8e-02    | -1.10 | 0.35     | -   |
| 74ENST00000324731 | GLULP4    | 5          | pseudogene     | 3.4e-02    | 0.95  | 4.8e-02    | 1.09  | 0.14     | -   |
| 74ENST00000427120 | ABCC5     | 12         | protein_coding | 5.0e-03    | 1.34  | 2.1e-02    | 1.08  | -0.25    | YY  |
| 74ENST00000420632 | MFSD2A    | 29         | protein_coding | 2.0e-02    | -1.13 | 4.7e-02    | -1.08 | 0.05     | -   |
| 74ENST00000232888 | RRP9      | 38         | protein_coding | 1.5e-02    | -1.11 | 3.6e-02    | -1.07 | 0.04     | -   |
| 74ENST00000427737 | TUBA4A    | 11         | protein_coding | 1.0e-02    | 1.28  | 4.3e-02    | 1.06  | -0.22    | YY  |
| 74ENST00000453175 | ADAP1     | 12         | protein_coding | 9.2e-03    | -1.31 | 4.7e-02    | -1.02 | 0.29     | -   |
| 74ENST00000271324 | CD53      | 24         | protein_coding | 7.7e-03    | 1.12  | 2.1e-02    | 1.01  | -0.11    | YY  |
| 74ENST00000339526 | GLUL      | 14         | protein_coding | 8.6e-03    | 1.10  | 2.2e-02    | 1.00  | -0.10    | YY  |

**Supplementary Table S1:** Significantly differentially expressed genes between 6 hours PRED and EtHO treated cells. Values for DEX and PRED treatments are shown in columns with suffix *D* and *P*, respectively. Column *M.PvsD* displays the difference in GC-regulation between PRED and DEX treatment. Column GBR contains ChIP-chip determined GR-DNA interaction information from [5] (with *YY* and *Y-* indicating an identified GR-DNA interaction in their promoter region of the gene with or without the presence of a GR-response element, respectively; *-* represents genes without a GR-DNA interaction and an empty cell is shown for genes that could not be detected by ChIP-chip. Not highlighted rows indicate genes significantly regulated due to PRED as well as to DEX exposure. Blue coloring highlights genes which don't meet the regulation, ( $|M| > 1$ ) but satisfy the significance cut-off ( $p_{BH} < 0.05$ ) in DEX treated samples.

| Probe set ID      | Gene name  | No. probes | Gene biotype   | $p_{BH}.D$ | $M.D$ | $p_{BH}.P$ | $M.P$ | $M.PvsD$ | GBR |
|-------------------|------------|------------|----------------|------------|-------|------------|-------|----------|-----|
| 74ENST00000372382 | TSC22D3    | 14         | protein_coding | 2.0e-05    | 6.21  | 2.4e-05    | 6.06  | -0.15    | YY  |
| 74ENST00000215912 | PIK3IP1    | 23         | protein_coding | 4.2e-05    | 5.72  | 4.9e-05    | 5.34  | -0.38    | Y-  |
| 74ENST00000519576 | TRIB1      | 10         | protein_coding | 1.7e-04    | 5.23  | 7.4e-04    | 4.13  | -1.10    | YY  |
| 74ENST00000371432 | RUNX2      | 18         | protein_coding | 7.2e-04    | 5.09  | 1.4e-03    | 4.74  | -0.35    | -   |
| 74ENST00000469578 | RGS1       | 13         | protein_coding | 2.1e-02    | 4.20  | 9.6e-02    | 3.32  | -0.88    | -   |
| 74ENST00000411990 | PFKFB2     | 14         | protein_coding | 4.2e-05    | 4.07  | 4.9e-05    | 3.99  | -0.08    | YY  |
| 74ENST00000546756 | GRASP      | 15         | protein_coding | 1.7e-04    | 3.86  | 6.6e-04    | 3.27  | -0.59    | YY  |
| 74ENST00000369096 | PRDM1      | 30         | protein_coding | 3.3e-04    | 3.63  | 1.2e-03    | 2.87  | -0.76    | YY  |
| 74ENST00000223795 | TNFSF8     | 30         | protein_coding | 3.9e-04    | 3.58  | 7.4e-04    | 3.26  | -0.32    | YY  |
| 74ENST00000332029 | SOC51      | 16         | protein_coding | 1.3e-04    | 3.52  | 6.0e-04    | 2.89  | -0.63    | YY  |
| 74ENST00000298472 | SLC18A2    | 32         | protein_coding | 7.2e-04    | 3.07  | 5.2e-03    | 2.32  | -0.74    | -   |
| 74ENST00000533174 | FMO5       | 9          | protein_coding | 3.3e-03    | 3.01  | 2.1e-02    | 2.21  | -0.80    | -   |
| 74ENST00000344120 | SPRY4      | 29         | protein_coding | 1.7e-03    | 2.90  | 6.6e-03    | 2.46  | -0.43    | -   |
| 74ENST00000523524 | CRISPLD1   | 19         | protein_coding | 1.9e-02    | 2.81  | 7.0e-02    | 2.29  | -0.52    | -   |
| 74ENST00000423557 | IL10       | 32         | protein_coding | 4.1e-02    | 2.78  | 1.6e-01    | 2.13  | -0.65    | YY  |
| 74ENST00000526627 | SMIM3      | 27         | protein_coding | 1.8e-03    | 2.78  | 8.0e-03    | 2.32  | -0.46    | -   |
| 74ENST00000603378 | C1orf186   | 12         | protein_coding | 6.1e-03    | 2.77  | 4.2e-02    | 2.05  | -0.72    | -   |
| 74ENST00000263464 | BIRC3      | 34         | protein_coding | 5.6e-04    | 2.75  | 8.0e-03    | 1.79  | -0.96    | YY  |
| 74ENST00000392316 | MYO1B      | 31         | protein_coding | 6.5e-03    | 2.73  | 1.6e-02    | 2.55  | -0.18    | -   |
| 74ENST00000392320 | STAT4      | 24         | protein_coding | 6.1e-03    | 2.71  | 9.5e-03    | 2.76  | 0.04     | -   |
| 74ENST00000402914 | MACROD2    | 21         | protein_coding | 4.2e-04    | 2.63  | 7.4e-04    | 2.45  | -0.18    | -   |
| 74ENST00000560741 | ISG20      | 9          | protein_coding | 3.3e-04    | 2.61  | 6.0e-04    | 2.57  | -0.04    | YY  |
| 74ENST00000429028 | OLAH       | 14         | protein_coding | 2.0e-02    | 2.55  | 1.8e-01    | 1.42  | -1.12    | -   |
| 74ENST00000535438 | AIM1       | 15         | protein_coding | 1.1e-02    | 2.51  | 4.5e-02    | 2.07  | -0.44    | YY  |
| 74ENST00000600109 | AC010441.1 | 23         | protein_coding | 1.7e-03    | 2.51  | 6.1e-03    | 2.15  | -0.36    | -   |
| 74ENST00000450123 | BCL6       | 20         | protein_coding | 2.0e-02    | 2.50  | 1.8e-01    | 1.40  | -1.10    | -   |
| 74ENST00000371852 | CH25H      | 25         | protein_coding | 3.8e-02    | 2.50  | 3.9e-01    | 1.02  | -1.47    | YY  |
| 74ENST00000274030 | USP53      | 36         | protein_coding | 4.1e-03    | 2.49  | 2.1e-02    | 1.95  | -0.55    | -   |
| 74ENST00000242465 | SRGN       | 22         | protein_coding | 4.2e-03    | 2.45  | 3.3e-02    | 1.76  | -0.69    | -   |
| 74ENST00000399272 | RCAN1      | 14         | protein_coding | 9.9e-04    | 2.45  | 7.2e-03    | 1.85  | -0.60    | YY  |
| 74ENST00000425083 | TPO        | 13         | protein_coding | 9.2e-03    | 2.45  | 1.0e-01    | 1.46  | -0.99    | -   |
| 74ENST00000301452 | ACER1      | 31         | protein_coding | 3.9e-03    | 2.43  | 1.7e-02    | 1.96  | -0.47    | -   |
| 74ENST00000427399 | APLN       | 12         | protein_coding | 2.0e-02    | -2.42 | 4.3e-02    | -2.47 | -0.05    | YY  |
| 74ENST00000355631 | OPRL1      | 24         | protein_coding | 7.3e-03    | -2.41 | 3.8e-02    | -1.91 | 0.49     | -   |
| 74ENST00000365249 | RNU6-302P  | 18         | snRNA          | 3.6e-02    | -2.41 | 1.5e-01    | -1.79 | 0.62     | -   |
| 74ENST00000297689 | NFIL3      | 25         | protein_coding | 7.2e-04    | 2.38  | 1.4e-03    | 2.23  | -0.15    | -   |
| 74ENST00000460774 | ST3GAL6    | 13         | protein_coding | 1.1e-02    | 2.35  | 2.4e-02    | 2.26  | -0.08    | Y-  |
| 74ENST00000256015 | BTG1       | 22         | protein_coding | 1.7e-03    | 2.24  | 3.5e-03    | 2.12  | -0.12    | -   |
| 74ENST00000541960 | GABARAPL1  | 11         | protein_coding | 3.5e-02    | 2.23  | 1.5e-01    | 1.67  | -0.56    | Y-  |
| 74ENST00000284273 | UBASH3B    | 46         | protein_coding | 5.8e-03    | 2.23  | 1.6e-02    | 1.99  | -0.24    | -   |
| 74ENST00000331555 | C1orf186   | 23         | protein_coding | 1.8e-03    | 2.22  | 9.5e-03    | 1.74  | -0.49    | -   |
| 74ENST00000228434 | CD69       | 28         | protein_coding | 4.1e-03    | 2.18  | 1.4e-02    | 1.87  | -0.31    | YY  |
| 74ENST00000368104 | SLAMF8     | 15         | protein_coding | 1.2e-02    | -2.16 | 4.2e-02    | -1.91 | 0.25     | Y-  |
| 74ENST00000446822 | DFNA5      | 10         | protein_coding | 1.4e-03    | 2.14  | 2.2e-03    | 2.10  | -0.04    | -   |

| Probe set ID      | Gene name      | No. probes | Gene biotype   | $p_{BH.D}$ | $M.D$ | $p_{BH.P}$ | $M.P$ | $M.PvsD$ | GBR |
|-------------------|----------------|------------|----------------|------------|-------|------------|-------|----------|-----|
| 74ENST00000542713 | FKBP5          | 17         | protein_coding | 5.4e-04    | 2.11  | 7.4e-04    | 2.11  | 0.00     | YY  |
| 74ENST00000586222 | LDLRAD4        | 10         | protein_coding | 4.1e-03    | 2.09  | 2.1e-02    | 1.63  | -0.45    | YY  |
| 74ENST00000554387 | RGMA           | 18         | protein_coding | 5.3e-03    | -2.05 | 4.3e-02    | -1.47 | 0.59     | -   |
| 74ENST00000459497 | snoU13         | 25         | snoRNA         | 7.0e-04    | 2.03  | 4.7e-02    | 0.89  | -1.14    | -   |
| 74ENST00000404953 | GATSL3         | 22         | protein_coding | 3.9e-03    | 2.00  | 4.2e-02    | 1.32  | -0.69    | Y-  |
| 74ENST00000405953 | BCL2L11        | 15         | protein_coding | 9.5e-04    | 2.00  | 5.0e-03    | 1.61  | -0.39    | -   |
| 74ENST00000371080 | ROR1           | 20         | protein_coding | 8.6e-03    | 1.97  | 4.3e-02    | 1.55  | -0.43    | -   |
| 74ENST00000413146 | TNFRSF8        | 18         | protein_coding | 2.3e-02    | -1.96 | 1.7e-01    | -1.19 | 0.78     | -   |
| 74ENST00000577287 | CD226          | 14         | protein_coding | 4.2e-02    | 1.90  | 1.7e-01    | 1.39  | -0.51    | -   |
| 74ENST00000284476 | DISP1          | 36         | protein_coding | 1.1e-02    | 1.90  | 8.2e-02    | 1.29  | -0.61    | -   |
| 74ENST00000379979 | GLRX           | 10         | protein_coding | 2.0e-02    | 1.90  | 5.9e-02    | 1.66  | -0.23    | -   |
| 74ENST00000394510 | AKAP13         | 42         | protein_coding | 1.4e-02    | 1.89  | 5.1e-02    | 1.55  | -0.34    | -   |
| 74ENST00000348335 | CAMKK1         | 23         | protein_coding | 1.5e-02    | -1.89 | 7.0e-02    | -1.44 | 0.45     | -   |
| 74ENST00000467177 | SLC22A23       | 9          | protein_coding | 2.4e-02    | 1.88  | 7.7e-02    | 1.64  | -0.24    | Y-  |
| 74ENST00000529560 | FAM3           | 10         | protein_coding | 5.4e-04    | 1.87  | 1.1e-03    | 1.72  | -0.15    | YY  |
| 74ENST00000395348 | SLC16A9        | 29         | protein_coding | 2.0e-02    | -1.86 | 7.0e-02    | -1.58 | 0.27     | -   |
| 74ENST00000366899 | DUSP10         | 27         | protein_coding | 3.4e-02    | 1.85  | 1.3e-01    | 1.47  | -0.38    | Y-  |
| 74ENST00000541723 | FAM222A-AS1    | 18         | antisense      | 1.1e-02    | -1.85 | 6.6e-02    | -1.35 | 0.50     | -   |
| 74ENST00000465067 | RN7SL334P      | 16         | misc_RNA       | 1.3e-02    | 1.84  | 4.3e-02    | 1.58  | -0.25    | -   |
| 74ENST00000378023 | FAM65B         | 18         | protein_coding | 9.7e-03    | 1.83  | 4.3e-02    | 1.49  | -0.35    | -   |
| 74ENST00000398788 | CDH23          | 22         | protein_coding | 8.6e-03    | 1.83  | 4.2e-02    | 1.47  | -0.36    | -   |
| 74ENST00000321560 | PLD6           | 30         | protein_coding | 1.1e-02    | -1.83 | 4.3e-02    | -1.56 | 0.26     | -   |
| 74ENST00000232424 | HES1           | 23         | protein_coding | 3.0e-03    | -1.82 | 4.2e-02    | -1.13 | 0.69     | Y-  |
| 74ENST00000370217 | ARHGAP29       | 13         | protein_coding | 9.7e-03    | 1.82  | 9.1e-03    | 2.10  | 0.28     | -   |
| 74ENST00000462804 | EV12A          | 22         | protein_coding | 4.0e-02    | 1.81  | 1.3e-01    | 1.53  | -0.28    | Y-  |
| 74ENST00000292174 | CXCR5          | 22         | protein_coding | 1.1e-02    | -1.81 | 4.2e-02    | -1.55 | 0.26     | Y-  |
| 74ENST00000427060 | SLA            | 23         | protein_coding | 1.1e-02    | 1.81  | 4.3e-02    | 1.53  | -0.28    | YY  |
| 74ENST00000240587 | TSHZ3          | 21         | protein_coding | 1.4e-02    | 1.77  | 5.1e-02    | 1.47  | -0.30    | -   |
| 74ENST00000330258 | AMER1          | 36         | protein_coding | 8.1e-03    | -1.77 | 4.8e-02    | -1.31 | 0.46     | -   |
| 74ENST00000488580 | GCSAM          | 11         | protein_coding | 1.5e-02    | 1.77  | 5.8e-02    | 1.43  | -0.34    | -   |
| 74ENST00000385045 | MIR15B         | 25         | miRNA          | 1.7e-02    | 1.76  | 1.6e-01    | 1.00  | -0.76    | -   |
| 74ENST00000496490 | RN7SL280P      | 22         | misc_RNA       | 2.0e-02    | 1.75  | 1.3e-01    | 1.18  | -0.57    | -   |
| 74ENST00000495373 | ARHGFEF3       | 19         | protein_coding | 3.7e-02    | 1.75  | 9.9e-02    | 1.61  | -0.13    | Y-  |
| 74ENST00000504304 | NPNT           | 10         | protein_coding | 4.0e-02    | 1.75  | 2.3e-01    | 1.04  | -0.71    | -   |
| 74ENST00000250916 | KLF16          | 27         | protein_coding | 1.1e-02    | -1.74 | 4.9e-02    | -1.38 | 0.37     | -   |
| 74ENST00000420890 | CCDC141        | 43         | protein_coding | 4.7e-02    | 1.74  | 3.4e-01    | 0.85  | -0.88    | -   |
| 74ENST00000373866 | ARMC12         | 23         | protein_coding | 4.4e-02    | 1.73  | 1.3e-01    | 1.49  | -0.24    | YY  |
| 74ENST00000545786 | GBA2           | 23         | protein_coding | 3.5e-02    | 1.73  | 1.5e-01    | 1.28  | -0.45    | YY  |
| 74ENST00000216101 | RASL10A        | 19         | protein_coding | 4.7e-02    | 1.72  | 1.4e-01    | 1.47  | -0.24    | -   |
| 74ENST00000506445 | GRAMD3         | 15         | protein_coding | 3.5e-02    | 1.71  | 9.6e-02    | 1.57  | -0.13    | -   |
| 74ENST00000541728 | RSAD2          | 17         | protein_coding | 3.9e-03    | 1.70  | 1.9e-02    | 1.32  | -0.38    | Y-  |
| 74ENST00000246672 | NR1D1          | 30         | protein_coding | 3.0e-03    | -1.69 | 6.1e-03    | -1.62 | 0.07     | -   |
| 74ENST00000444998 | MCM3AP-AS1     | 12         | antisense      | 2.5e-02    | -1.69 | 1.5e-01    | -1.11 | 0.57     | YY  |
| 74ENST00000409781 | CD8A           | 14         | protein_coding | 5.3e-03    | 1.68  | 4.7e-02    | 1.15  | -0.54    | YY  |
| 74ENST00000428977 | TRANK1         | 25         | protein_coding | 1.1e-02    | 1.67  | 4.3e-02    | 1.41  | -0.27    | -   |
| 74ENST00000600723 | LINC00528      | 24         | lincRNA        | 1.7e-03    | 1.67  | 8.2e-03    | 1.35  | -0.33    | -   |
| 74ENST00000392753 | RBMS1          | 10         | protein_coding | 2.3e-02    | 1.67  | 8.3e-02    | 1.41  | -0.26    | Y-  |
| 74ENST00000399090 | GRAP2          | 15         | protein_coding | 4.9e-03    | 1.65  | 1.5e-02    | 1.46  | -0.19    | YY  |
| 74ENST00000393808 | ST3GAL5        | 20         | protein_coding | 2.8e-02    | 1.65  | 6.0e-02    | 1.62  | -0.03    | -   |
| 74ENST00000482743 | ARHGAP31       | 10         | protein_coding | 2.1e-02    | 1.65  | 1.1e-01    | 1.24  | -0.41    | Y-  |
| 74ENST00000363841 | RNA5SP28       | 24         | rRNA           | 3.1e-02    | -1.65 | 1.4e-01    | -1.19 | 0.45     | -   |
| 74ENST00000526280 | SMPD1          | 12         | protein_coding | 2.1e-02    | 1.64  | 1.1e-01    | 1.25  | -0.39    | -   |
| 74ENST00000322522 | INPP1          | 25         | protein_coding | 7.7e-03    | 1.62  | 8.6e-02    | 0.98  | -0.64    | YY  |
| 74ENST00000535710 | VWCE           | 9          | protein_coding | 1.0e-02    | -1.61 | 4.3e-02    | -1.32 | 0.29     | -   |
| 74ENST00000400473 | CABLES1        | 18         | protein_coding | 9.7e-03    | -1.60 | 1.2e-01    | -0.91 | 0.69     | -   |
| 74ENST00000435205 | FAM160A1       | 8          | protein_coding | 1.5e-02    | 1.59  | 2.0e-01    | 0.74  | -0.85    | -   |
| 74ENST00000380615 | KATNAL1        | 33         | protein_coding | 1.1e-02    | 1.59  | 1.8e-02    | 1.65  | 0.05     | Y-  |
| 74ENST00000307145 | KLF13          | 28         | protein_coding | 3.3e-03    | 1.58  | 8.2e-03    | 1.44  | -0.14    | -   |
| 74ENST00000562833 | RP11-152F13.10 | 17         | protein_coding | 2.8e-02    | -1.56 | 7.1e-02    | -1.46 | 0.10     | -   |
| 74ENST00000540964 | TLR5           | 24         | protein_coding | 6.1e-03    | 1.56  | 1.5e-01    | 0.69  | -0.86    | -   |
| 74ENST00000377066 | TMEM2          | 24         | protein_coding | 3.8e-02    | 1.56  | 1.8e-01    | 1.06  | -0.50    | -   |
| 74ENST00000259523 | MYC            | 14         | protein_coding | 1.5e-02    | -1.54 | 9.6e-02    | -1.09 | 0.46     | -   |
| 74ENST00000416954 | NR3C1          | 17         | protein_coding | 9.5e-04    | 1.54  | 1.2e-03    | 1.55  | 0.02     | -   |
| 74ENST00000450751 | CPBE1          | 28         | protein_coding | 1.6e-02    | -1.53 | 4.9e-02    | -1.33 | 0.20     | -   |
| 74ENST00000557389 | NFKBIA         | 21         | protein_coding | 1.6e-03    | 1.53  | 1.0e-02    | 1.12  | -0.41    | -   |
| 74ENST00000544632 | SOX12          | 12         | protein_coding | 2.5e-02    | -1.53 | 2.2e-01    | -0.80 | 0.74     | -   |
| 74ENST00000442250 | ITGA6          | 28         | protein_coding | 1.7e-03    | 1.53  | 4.9e-03    | 1.41  | -0.12    | YY  |
| 74ENST00000384151 | SNORA51        | 25         | snoRNA         | 4.3e-02    | -1.52 | 1.8e-01    | -1.11 | 0.41     | -   |
| 74ENST00000367545 | UTRN           | 78         | protein_coding | 2.8e-02    | 1.50  | 9.6e-02    | 1.28  | -0.22    | -   |
| 74ENST00000383877 | RNU6-425P      | 24         | snRNA          | 1.4e-02    | -1.50 | 2.7e-02    | -1.50 | -0.00    | -   |
| 74ENST00000458357 | FHL1           | 9          | protein_coding | 2.1e-02    | 1.49  | 1.2e-01    | 1.08  | -0.41    | -   |
| 74ENST00000476808 | KLHL24         | 18         | protein_coding | 9.7e-03    | 1.49  | 3.3e-02    | 1.31  | -0.18    | -   |
| 74ENST00000417216 | RBMS1P1        | 7          | pseudogene     | 2.9e-02    | 1.47  | 1.1e-01    | 1.19  | -0.28    | -   |
| 74ENST00000589804 | CD3EAP         | 22         | protein_coding | 1.4e-02    | -1.47 | 4.8e-02    | -1.25 | 0.22     | -   |
| 74ENST00000372548 | CXorf57        | 42         | protein_coding | 2.8e-02    | 1.47  | 1.3e-01    | 1.06  | -0.41    | -   |
| 74ENST00000393759 | CD8B           | 10         | protein_coding | 3.5e-02    | 1.47  | 2.3e-01    | 0.83  | -0.64    | -   |
| 74ENST00000548553 | METTL7A        | 30         | protein_coding | 3.9e-03    | 1.47  | 8.0e-03    | 1.40  | -0.07    | YY  |

| Probe set ID      | Gene name     | No. probes | Gene biotype           | $p_{BH.D}$ | $M.D$ | $p_{BH.P}$ | $M.P$ | $M.PvsD$ | GBR |
|-------------------|---------------|------------|------------------------|------------|-------|------------|-------|----------|-----|
| 74ENST00000560041 | C15orf61      | 13         | protein_coding         | 2.0e-02    | -1.46 | 8.2e-02    | -1.20 | 0.27     | -   |
| 74ENST00000378430 | CD72          | 12         | protein_coding         | 2.4e-02    | 1.46  | 1.8e-01    | 0.89  | -0.58    | YY  |
| 74ENST00000365211 | RNU6-1280P    | 25         | snRNA                  | 3.7e-02    | 1.46  | 1.8e-01    | 1.01  | -0.45    | -   |
| 74ENST00000589295 | MAP2K6        | 11         | protein_coding         | 2.9e-02    | 1.46  | 1.4e-01    | 1.06  | -0.40    | -   |
| 74ENST00000444013 | PTPRM         | 28         | protein_coding         | 1.8e-02    | 1.46  | 1.2e-01    | 0.99  | -0.46    | -   |
| 74ENST00000295379 | BMP10         | 28         | protein_coding         | 3.3e-03    | -1.44 | 1.8e-02    | -1.10 | 0.35     | -   |
| 74ENST00000299440 | RAG1          | 16         | protein_coding         | 3.4e-02    | -1.44 | 1.2e-01    | -1.16 | 0.28     | -   |
| 74ENST00000537350 | RCSD1         | 17         | protein_coding         | 8.6e-03    | 1.44  | 1.5e-02    | 1.46  | 0.02     | Y-  |
| 74ENST00000503569 | WFS1          | 36         | protein_coding         | 3.2e-03    | 1.42  | 9.5e-03    | 1.22  | -0.20    | YY  |
| 74ENST00000449083 | NET1          | 11         | protein_coding         | 8.7e-03    | 1.42  | 7.0e-02    | 0.95  | -0.47    | -   |
| 74ENST00000317811 | FIX1          | 26         | protein_coding         | 2.8e-02    | -1.42 | 1.2e-01    | -1.10 | 0.32     | -   |
| 74ENST00000527775 | WT1           | 10         | protein_coding         | 4.5e-02    | -1.42 | 1.5e-01    | -1.13 | 0.29     | -   |
| 74ENST00000392861 | ZEB2          | 15         | protein_coding         | 1.6e-02    | -1.41 | 9.6e-02    | -1.00 | 0.41     | -   |
| 74ENST00000405914 | KIF3C         | 29         | protein_coding         | 2.6e-02    | 1.40  | 1.2e-01    | 1.08  | -0.32    | -   |
| 74ENST00000571655 | SNTB2         | 15         | protein_coding         | 4.5e-02    | 1.38  | 1.7e-01    | 1.03  | -0.35    | -   |
| 74ENST00000479665 | AZI2          | 24         | protein_coding         | 7.3e-03    | 1.38  | 7.0e-02    | 0.88  | -0.50    | -   |
| 74ENST00000587065 | PDCD2L        | 10         | protein_coding         | 4.1e-03    | -1.37 | 3.2e-02    | -0.98 | 0.39     | YY  |
| 74ENST00000376085 | LRRC38        | 21         | protein_coding         | 1.1e-02    | 1.37  | 9.6e-02    | 0.87  | -0.50    | -   |
| 74ENST00000516125 | RNU6-1143P    | 24         | snRNA                  | 3.3e-03    | -1.37 | 5.2e-02    | -0.78 | 0.59     | -   |
| 74ENST00000243440 | BATF3         | 21         | protein_coding         | 2.9e-02    | -1.37 | 1.1e-01    | -1.11 | 0.25     | -   |
| 74ENST00000339468 | LYEL1         | 26         | protein_coding         | 3.5e-02    | 1.37  | 1.7e-01    | 0.94  | -0.43    | -   |
| 74ENST00000560491 | LYSMD2        | 9          | protein_coding         | 3.6e-02    | -1.35 | 1.8e-01    | -0.93 | 0.42     | -   |
| 74ENST00000399202 | FAM214A       | 26         | protein_coding         | 4.8e-02    | 1.35  | 1.2e-01    | 1.29  | -0.06    | -   |
| 74ENST00000410065 | SFXN5         | 22         | protein_coding         | 3.4e-02    | 1.35  | 1.5e-01    | 1.00  | -0.35    | -   |
| 74ENST00000278505 | ENDOD1        | 25         | protein_coding         | 1.4e-02    | -1.34 | 6.2e-02    | -1.04 | 0.31     | -   |
| 74ENST00000359831 | TRAF3IP2      | 30         | protein_coding         | 2.5e-02    | 1.34  | 1.1e-01    | 1.05  | -0.30    | -   |
| 74ENST00000528910 | USP35         | 14         | protein_coding         | 2.6e-02    | 1.34  | 1.4e-01    | 0.93  | -0.41    | -   |
| 74ENST00000427120 | ABCC5         | 12         | protein_coding         | 5.0e-03    | 1.34  | 2.1e-02    | 1.08  | -0.25    | YY  |
| 74ENST00000590841 | OLFM2         | 21         | protein_coding         | 2.6e-02    | 1.34  | 6.6e-02    | 1.25  | -0.09    | -   |
| 74ENST00000502464 | NLN           | 30         | protein_coding         | 2.1e-02    | -1.33 | 1.2e-01    | -0.94 | 0.39     | -   |
| 74ENST00000539444 | DISC1         | 32         | protein_coding         | 1.0e-02    | 1.33  | 6.2e-02    | 0.96  | -0.38    | YY  |
| 74ENST00000443829 | NBEAL2        | 27         | protein_coding         | 1.8e-02    | 1.33  | 1.1e-01    | 0.92  | -0.41    | -   |
| 74ENST00000439286 | GARNL3        | 9          | protein_coding         | 4.7e-02    | -1.33 | 1.2e-01    | -1.22 | 0.10     | -   |
| 74ENST00000307365 | DDIT4         | 30         | protein_coding         | 5.8e-03    | 1.32  | 1.3e-02    | 1.25  | -0.07    | -   |
| 74ENST00000453496 | C6orf183      | 21         | polymorphic_pseudogene | 1.8e-02    | 1.32  | 1.2e-01    | 0.89  | -0.43    | -   |
| 74ENST00000361933 | CD300A        | 10         | protein_coding         | 3.4e-02    | -1.31 | 1.8e-01    | -0.84 | 0.47     | Y-  |
| 74ENST00000453175 | ADAP1         | 12         | protein_coding         | 9.2e-03    | -1.31 | 4.7e-02    | -1.02 | 0.29     | -   |
| 74ENST00000489474 | RPS18         | 4          | protein_coding         | 3.6e-02    | -1.31 | 3.6e-01    | -0.57 | 0.74     | -   |
| 74ENST00000385135 | MIR221        | 25         | miRNA                  | 1.8e-02    | -1.30 | 7.3e-02    | -1.03 | 0.27     | -   |
| 74ENST00000452476 | LYAR          | 26         | protein_coding         | 2.4e-02    | -1.30 | 1.2e-01    | -0.98 | 0.32     | -   |
| 74ENST00000442791 | YAF2          | 20         | protein_coding         | 4.9e-03    | 1.29  | 1.1e-02    | 1.20  | -0.10    | YY  |
| 74ENST00000182527 | TRAM2         | 24         | protein_coding         | 1.6e-02    | 1.29  | 8.6e-02    | 0.95  | -0.34    | -   |
| 74ENST00000546243 | THRA          | 23         | protein_coding         | 1.5e-02    | -1.29 | 5.9e-02    | -1.05 | 0.25     | -   |
| 74ENST00000580518 | TLCD1         | 17         | protein_coding         | 4.9e-02    | -1.29 | 1.3e-01    | -1.16 | 0.13     | -   |
| 74ENST00000434291 | RP1-130H16.18 | 31         | protein_coding         | 5.0e-03    | 1.29  | 4.8e-02    | 0.85  | -0.44    | Y-  |
| 74ENST00000564357 | DOCA2         | 18         | protein_coding         | 5.0e-03    | -1.29 | 1.6e-02    | -1.12 | 0.16     | -   |
| 74ENST00000311916 | C10orf2       | 22         | protein_coding         | 3.6e-02    | -1.29 | 1.8e-01    | -0.87 | 0.42     | -   |
| 74ENST00000408031 | GRAMD4        | 10         | protein_coding         | 1.5e-02    | 1.28  | 4.3e-02    | 1.18  | -0.11    | -   |
| 74ENST00000427737 | TUBA4A        | 11         | protein_coding         | 1.0e-02    | 1.28  | 4.3e-02    | 1.06  | -0.22    | YY  |
| 74ENST00000331129 | ID2           | 9          | protein_coding         | 2.5e-02    | 1.28  | 1.2e-01    | 0.94  | -0.34    | YY  |
| 74ENST00000536831 | RRP12         | 34         | protein_coding         | 3.3e-02    | -1.28 | 1.3e-01    | -0.98 | 0.30     | -   |
| 74ENST00000565934 | RP11-77H9.2   | 6          | antisense              | 2.8e-02    | -1.28 | 4.7e-02    | -1.38 | -0.10    | -   |
| 74ENST00000445132 | CCR2          | 26         | protein_coding         | 2.6e-02    | 1.27  | 8.3e-02    | 1.11  | -0.16    | YY  |
| 74ENST00000369886 | SAMD10        | 18         | protein_coding         | 3.0e-02    | -1.27 | 1.4e-01    | -0.92 | 0.34     | -   |
| 74ENST00000509972 | CCNG2         | 14         | protein_coding         | 3.0e-02    | 1.25  | 4.9e-02    | 1.35  | 0.10     | -   |
| 74ENST00000372718 | SMAP2         | 24         | protein_coding         | 4.2e-03    | 1.25  | 8.4e-03    | 1.19  | -0.06    | Y-  |
| 74ENST00000370012 | PPRC1         | 15         | protein_coding         | 3.6e-02    | -1.25 | 9.6e-02    | -1.16 | 0.09     | -   |
| 74ENST00000357898 | SPSB1         | 15         | protein_coding         | 1.6e-02    | -1.25 | 9.6e-02    | -0.88 | 0.36     | -   |
| 74ENST00000264036 | MCAM          | 42         | protein_coding         | 3.5e-02    | 1.25  | 1.4e-01    | 0.96  | -0.28    | -   |
| 74ENST00000342232 | JPH1          | 27         | protein_coding         | 2.8e-02    | -1.24 | 1.4e-01    | -0.87 | 0.37     | -   |
| 74ENST00000543444 | ALKBH2        | 16         | protein_coding         | 9.7e-03    | -1.24 | 5.8e-02    | -0.90 | 0.34     | -   |
| 74ENST00000394234 | DCAF4         | 26         | protein_coding         | 2.0e-02    | -1.24 | 9.6e-02    | -0.97 | 0.27     | -   |
| 74ENST00000492799 | RN7SL472P     | 25         | misc_RNA               | 3.4e-02    | -1.23 | 8.3e-02    | -1.18 | 0.05     | -   |
| 74ENST00000588679 | RNF165        | 20         | protein_coding         | 6.8e-03    | -1.23 | 3.7e-02    | -0.97 | 0.27     | -   |
| 74ENST00000346049 | PTK2B         | 35         | protein_coding         | 2.9e-02    | 1.23  | 1.9e-01    | 0.73  | -0.50    | -   |
| 74ENST00000504179 | RHOBTB3       | 10         | protein_coding         | 3.3e-02    | 1.23  | 7.9e-02    | 1.18  | -0.05    | Y-  |
| 74ENST00000384382 | RNU1-106P     | 22         | snRNA                  | 4.7e-02    | -1.23 | 1.4e-01    | -1.03 | 0.20     | -   |
| 74ENST00000581301 | MRM1          | 7          | protein_coding         | 3.2e-02    | -1.23 | 2.5e-01    | -0.65 | 0.58     | -   |
| 74ENST00000317995 | CA8           | 20         | protein_coding         | 1.7e-02    | -1.23 | 7.0e-02    | -0.98 | 0.25     | -   |
| 74ENST00000428356 | EIF2S2P3      | 17         | pseudogene             | 2.6e-02    | -1.23 | 1.8e-01    | -0.73 | 0.50     | -   |
| 74ENST00000553215 | EGLN3         | 9          | protein_coding         | 2.2e-02    | 1.22  | 1.2e-01    | 0.87  | -0.35    | -   |
| 74ENST00000535815 | GPR68         | 28         | protein_coding         | 2.9e-02    | -1.22 | 1.6e-01    | -0.82 | 0.40     | -   |
| 74ENST00000358923 | PDE4D         | 14         | protein_coding         | 4.9e-02    | 1.21  | 1.2e-01    | 1.16  | -0.05    | -   |
| 74ENST00000357195 | BCL11B        | 22         | protein_coding         | 7.3e-03    | -1.21 | 5.8e-02    | -0.82 | 0.39     | -   |
| 74ENST00000458008 | FAM86A        | 9          | protein_coding         | 3.4e-02    | -1.21 | 1.4e-01    | -0.91 | 0.30     | -   |
| 74ENST00000572887 | DHODH         | 24         | protein_coding         | 2.1e-02    | -1.21 | 1.1e-01    | -0.90 | 0.31     | -   |
| 74ENST00000395780 | MAPK12        | 23         | protein_coding         | 2.1e-02    | -1.20 | 1.1e-01    | -0.91 | 0.29     | -   |

| Probe set ID      | Gene name     | No. probes | Gene biotype         | $p_{BH.D}$ | $M.D$ | $p_{BH.P}$ | $M.P$ | $M.PvsD$ | GBR |
|-------------------|---------------|------------|----------------------|------------|-------|------------|-------|----------|-----|
| 74ENST00000290573 | HK2           | 5          | protein_coding       | 3.9e-03    | -1.20 | 1.6e-02    | -0.98 | 0.22     | -   |
| 74ENST00000426499 | IFRD2         | 9          | protein_coding       | 1.8e-02    | -1.20 | 7.3e-02    | -0.95 | 0.25     | -   |
| 74ENST00000262487 | ISM1          | 28         | protein_coding       | 3.7e-02    | -1.19 | 1.1e-01    | -1.09 | 0.11     | YY  |
| 74ENST00000378845 | CAMK1D        | 22         | protein_coding       | 5.0e-03    | 1.19  | 2.1e-02    | 0.96  | -0.22    | -   |
| 74ENST00000382031 | MAP1A         | 37         | protein_coding       | 2.2e-02    | 1.19  | 1.2e-01    | 0.87  | -0.31    | -   |
| 74ENST00000412135 | FGFR3         | 21         | protein_coding       | 6.1e-03    | -1.19 | 8.3e-03    | -1.24 | -0.05    | -   |
| 74ENST00000395109 | SEPT5         | 14         | protein_coding       | 3.5e-02    | -1.18 | 1.1e-01    | -1.03 | 0.15     | -   |
| 74ENST00000436639 | SESN1         | 28         | protein_coding       | 2.0e-02    | 1.18  | 1.4e-01    | 0.75  | -0.43    | Y-  |
| 74ENST00000425511 | TBC1D4        | 29         | protein_coding       | 2.4e-02    | -1.18 | 1.4e-01    | -0.80 | 0.38     | -   |
| 74ENST00000369889 | WBP1L         | 18         | protein_coding       | 6.1e-03    | 1.18  | 4.8e-02    | 0.82  | -0.36    | YY  |
| 74ENST00000442296 | MXI1          | 9          | protein_coding       | 4.8e-02    | -1.17 | 1.2e-01    | -1.06 | 0.11     | Y-  |
| 74ENST00000409743 | STK16         | 24         | protein_coding       | 3.2e-02    | 1.17  | 1.2e-01    | 0.96  | -0.21    | YY  |
| 74ENST00000600909 | KCNN4         | 12         | protein_coding       | 3.8e-02    | -1.17 | 1.9e-01    | -0.77 | 0.41     | -   |
| 74ENST00000428982 | SYNGAP1       | 22         | protein_coding       | 1.6e-02    | 1.17  | 1.8e-01    | 0.61  | -0.56    | -   |
| 74ENST00000434267 | MAP4          | 27         | protein_coding       | 4.0e-02    | -1.17 | 2.0e-01    | -0.76 | 0.40     | Y-  |
| 74ENST00000246006 | CD93          | 32         | protein_coding       | 2.0e-02    | 1.17  | 8.4e-02    | 0.93  | -0.24    | -   |
| 74ENST00000361619 | GTPBP3        | 24         | protein_coding       | 2.7e-02    | -1.17 | 5.9e-02    | -1.15 | 0.02     | -   |
| 74ENST00000434623 | AKAP2         | 9          | protein_coding       | 1.7e-02    | 1.17  | 1.2e-01    | 0.76  | -0.40    | -   |
| 74ENST00000356728 | RORC          | 28         | protein_coding       | 2.9e-02    | 1.16  | 6.3e-02    | 1.13  | -0.03    | Y-  |
| 74ENST00000223791 | AKNA          | 29         | protein_coding       | 1.5e-02    | 1.16  | 1.3e-01    | 0.70  | -0.46    | Y-  |
| 74ENST00000588019 | NLE1          | 12         | protein_coding       | 2.9e-02    | -1.16 | 1.7e-01    | -0.76 | 0.40     | -   |
| 74ENST00000393409 | PLXNA1        | 36         | protein_coding       | 1.3e-02    | 1.15  | 3.0e-01    | 0.41  | -0.75    | -   |
| 74ENST00000505729 | SMIM14        | 10         | protein_coding       | 3.8e-02    | 1.15  | 9.1e-02    | 1.11  | -0.04    | -   |
| 74ENST00000301335 | SLC43A2       | 27         | protein_coding       | 2.3e-02    | -1.15 | 6.9e-02    | -1.02 | 0.12     | -   |
| 74ENST00000367066 | TAGAP         | 43         | protein_coding       | 3.4e-02    | 1.15  | 9.6e-02    | 1.04  | -0.10    | Y-  |
| 74ENST00000217740 | RNF125        | 26         | protein_coding       | 2.4e-02    | 1.14  | 4.7e-02    | 1.18  | 0.03     | Y-  |
| 74ENST00000524526 | LONRF1        | 9          | protein_coding       | 4.8e-02    | -1.14 | 2.2e-01    | -0.75 | 0.39     | -   |
| 74ENST00000379109 | PAX6          | 11         | protein_coding       | 4.6e-02    | 1.14  | 1.2e-01    | 1.03  | -0.11    | -   |
| 74ENST00000539331 | RAPGEF4       | 27         | protein_coding       | 2.2e-02    | -1.14 | 9.6e-02    | -0.90 | 0.23     | -   |
| 74ENST00000340208 | MEF2C         | 16         | protein_coding       | 9.2e-03    | -1.14 | 5.2e-02    | -0.83 | 0.30     | YY  |
| 74ENST00000515965 | RNU6-377P     | 24         | snRNA                | 1.9e-02    | -1.13 | 1.9e-01    | -0.59 | 0.55     | -   |
| 74ENST00000580151 | SLC25A19      | 14         | protein_coding       | 2.0e-02    | -1.13 | 5.4e-02    | -1.03 | 0.11     | -   |
| 74ENST00000420632 | MFSD2A        | 29         | protein_coding       | 2.0e-02    | -1.13 | 4.7e-02    | -1.08 | 0.05     | -   |
| 74ENST00000574215 | NEK10         | 15         | protein_coding       | 4.5e-02    | 1.12  | 2.3e-01    | 0.70  | -0.42    | -   |
| 74ENST00000271324 | CD53          | 24         | protein_coding       | 7.7e-03    | 1.12  | 2.1e-02    | 1.01  | -0.11    | YY  |
| 74ENST00000391143 | SNORA48       | 25         | snoRNA               | 2.3e-02    | -1.12 | 1.7e-01    | -0.69 | 0.43     | -   |
| 74ENST00000357485 | ARID5A        | 30         | protein_coding       | 6.9e-03    | 1.12  | 4.3e-02    | 0.83  | -0.29    | -   |
| 74ENST00000379611 | CCDC112       | 31         | protein_coding       | 3.6e-02    | -1.12 | 9.6e-02    | -1.05 | 0.07     | -   |
| 74ENST00000416587 | RNF144A       | 9          | protein_coding       | 2.6e-02    | 1.11  | 2.0e-01    | 0.62  | -0.49    | -   |
| 74ENST00000323888 | RRP9          | 38         | protein_coding       | 1.5e-02    | -1.11 | 3.6e-02    | -1.07 | 0.04     | -   |
| 74ENST00000540377 | TMEM120B      | 11         | protein_coding       | 2.9e-02    | -1.11 | 4.8e-02    | -1.20 | -0.09    | -   |
| 74ENST00000461853 | RN7SL173P     | 25         | misc_RNA             | 9.1e-03    | -1.11 | 5.1e-01    | -0.23 | 0.88     | -   |
| 74ENST00000592740 | RP11-618P17.4 | 10         | protein_coding       | 3.6e-02    | -1.10 | 1.8e-01    | -0.75 | 0.36     | -   |
| 74ENST00000164024 | CELSR3        | 46         | protein_coding       | 4.1e-02    | -1.10 | 1.8e-01    | -0.80 | 0.31     | -   |
| 74ENST00000339526 | GLUL          | 14         | protein_coding       | 8.6e-03    | 1.10  | 2.2e-02    | 1.00  | -0.10    | YY  |
| 74ENST00000367084 | YOD1          | 20         | protein_coding       | 5.0e-03    | 1.10  | 8.3e-03    | 1.11  | 0.01     | YY  |
| 74ENST00000335142 | KTN1-AS1      | 23         | antisense            | 3.8e-02    | -1.10 | 1.6e-01    | -0.81 | 0.28     | YY  |
| 74ENST00000327483 | CBFA2T3       | 36         | protein_coding       | 3.4e-02    | -1.09 | 1.8e-01    | -0.73 | 0.36     | -   |
| 74ENST00000381293 | IL6ST         | 13         | protein_coding       | 7.7e-03    | 1.09  | 1.7e-01    | 0.48  | -0.61    | -   |
| 74ENST00000543175 | PTRH1         | 18         | protein_coding       | 2.1e-02    | 1.09  | 2.0e-01    | 0.58  | -0.51    | -   |
| 74ENST00000544604 | ZNRF3         | 32         | protein_coding       | 2.1e-02    | -1.09 | 9.2e-02    | -0.86 | 0.23     | -   |
| 74ENST00000354440 | CELF2         | 23         | protein_coding       | 8.1e-03    | 1.09  | 4.3e-02    | 0.85  | -0.24    | YY  |
| 74ENST00000371222 | JUN           | 32         | protein_coding       | 9.7e-03    | 1.09  | 1.1e-01    | 0.65  | -0.44    | -   |
| 74ENST00000409894 | POLR1B        | 30         | protein_coding       | 2.0e-02    | -1.08 | 8.3e-02    | -0.86 | 0.22     | -   |
| 74ENST00000397885 | KIAA0020      | 33         | protein_coding       | 2.0e-02    | -1.08 | 8.0e-02    | -0.88 | 0.21     | -   |
| 74ENST00000403484 | SEC14L2       | 28         | protein_coding       | 4.6e-02    | 1.08  | 2.1e-01    | 0.71  | -0.37    | -   |
| 74ENST00000330777 | SGK223        | 30         | protein_coding       | 1.6e-02    | 1.08  | 1.2e-01    | 0.67  | -0.41    | -   |
| 74ENST00000204517 | TFAP4         | 26         | protein_coding       | 1.3e-02    | -1.08 | 9.6e-02    | -0.72 | 0.36     | -   |
| 74ENST00000461019 | ATP6V0E2-AS1  | 27         | antisense            | 2.0e-02    | 1.08  | 1.2e-01    | 0.74  | -0.34    | YY  |
| 74ENST00000328771 | DHX34         | 25         | protein_coding       | 2.6e-02    | -1.07 | 6.3e-02    | -1.02 | 0.06     | -   |
| 74ENST00000583184 | RP11-5316.2   | 15         | processed_transcript | 3.7e-02    | 1.07  | 6.3e-02    | 1.15  | 0.08     | -   |
| 74ENST00000544928 | AL021707.2    | 3          | pseudogene           | 2.9e-02    | -1.07 | 3.7e-01    | -0.43 | 0.65     | -   |
| 74ENST00000227520 | CCDC86        | 15         | protein_coding       | 3.7e-02    | -1.07 | 8.5e-02    | -1.05 | 0.02     | -   |
| 74ENST00000395071 | SYNGAP1       | 27         | protein_coding       | 2.0e-02    | 1.07  | 1.5e-01    | 0.66  | -0.41    | -   |
| 74ENST00000356362 | PUS7          | 45         | protein_coding       | 2.7e-02    | -1.07 | 8.5e-02    | -0.93 | 0.14     | -   |
| 74ENST00000517440 | NKX2-5        | 9          | protein_coding       | 2.9e-02    | -1.07 | 1.1e-01    | -0.89 | 0.18     | -   |
| 74ENST00000397246 | IL15RA        | 10         | protein_coding       | 1.3e-02    | -1.07 | 6.6e-02    | -0.80 | 0.27     | -   |
| 74ENST00000365352 | Y_RNA         | 24         | misc_RNA             | 2.1e-02    | -1.06 | 4.2e-01    | -0.34 | 0.72     | -   |
| 74ENST00000337190 | MXD4          | 24         | protein_coding       | 3.6e-02    | 1.06  | 1.7e-01    | 0.76  | -0.30    | -   |
| 74ENST00000464412 | LBH           | 11         | protein_coding       | 2.0e-02    | 1.06  | 1.3e-01    | 0.70  | -0.36    | -   |
| 74ENST00000374557 | EPB41L4B      | 21         | protein_coding       | 1.4e-02    | 1.06  | 1.5e-01    | 0.58  | -0.48    | -   |
| 74ENST00000494911 | WT1-AS        | 12         | antisense            | 4.1e-02    | -1.06 | 1.6e-01    | -0.82 | 0.24     | -   |
| 74ENST00000264220 | PPAT          | 17         | protein_coding       | 2.0e-02    | -1.06 | 1.2e-01    | -0.74 | 0.31     | -   |
| 74ENST00000404926 | RP3-415N12.1  | 14         | pseudogene           | 4.1e-02    | -1.05 | 5.0e-01    | -0.35 | 0.71     | -   |
| 74ENST00000416935 | KIRREL        | 26         | protein_coding       | 3.0e-02    | -1.05 | 1.1e-01    | -0.89 | 0.16     | -   |
| 74ENST00000333090 | TSKU          | 21         | protein_coding       | 3.0e-02    | -1.05 | 9.6e-02    | -0.92 | 0.13     | YY  |
| 74ENST00000602634 | TSNAX-DISC1   | 49         | protein_coding       | 1.6e-02    | 1.05  | 1.2e-01    | 0.69  | -0.36    | -   |

| Probe set ID      | Gene name | No. probes | Gene biotype   | $p_{BH}.D$ | $M.D$ | $p_{BH}.P$ | $M.P$ | $M.PvsD$ | GBR |
|-------------------|-----------|------------|----------------|------------|-------|------------|-------|----------|-----|
| 74ENST00000493391 | ZNF566    | 19         | protein_coding | 1.8e-02    | -1.04 | 4.8e-02    | -0.96 | 0.08     | -   |
| 74ENST00000373109 | SPOCK2    | 37         | protein_coding | 1.5e-02    | 1.04  | 4.3e-02    | 0.94  | -0.10    | -   |
| 74ENST00000590935 | DUSP3     | 21         | protein_coding | 6.1e-03    | -1.04 | 5.1e-02    | -0.70 | 0.34     | -   |
| 74ENST00000409817 | CXCR4     | 27         | protein_coding | 2.0e-02    | 1.04  | 5.1e-02    | 0.97  | -0.07    | YY  |
| 74ENST00000581082 | PER1      | 30         | protein_coding | 2.0e-02    | 1.04  | 1.4e-01    | 0.66  | -0.38    | YY  |
| 74ENST00000446643 | WDR43     | 13         | protein_coding | 4.6e-02    | -1.04 | 1.6e-01    | -0.82 | 0.22     | -   |
| 74ENST00000378474 | MID1IP1   | 20         | protein_coding | 3.3e-02    | -1.03 | 1.2e-01    | -0.85 | 0.19     | -   |
| 74ENST00000585770 | MRM1      | 20         | protein_coding | 1.8e-02    | -1.03 | 6.0e-02    | -0.87 | 0.16     | Y-  |
| 74ENST00000427972 | UTP14A    | 9          | protein_coding | 1.1e-02    | -1.03 | 4.3e-02    | -0.86 | 0.17     | -   |
| 74ENST00000399107 | POLR3G    | 6          | protein_coding | 1.4e-02    | -1.03 | 5.5e-02    | -0.83 | 0.20     | -   |
| 74ENST00000517668 | ST3GAL1   | 9          | protein_coding | 1.4e-02    | -1.03 | 5.1e-02    | -0.83 | 0.19     | -   |
| 74ENST00000360128 | MAK16     | 33         | protein_coding | 2.0e-02    | -1.02 | 1.2e-01    | -0.71 | 0.31     | -   |
| 74ENST00000438527 | DDX31     | 24         | protein_coding | 1.9e-02    | -1.02 | 5.8e-02    | -0.89 | 0.13     | -   |
| 74ENST00000359013 | TGFBR2    | 23         | protein_coding | 2.2e-02    | 1.02  | 1.1e-01    | 0.77  | -0.25    | Y-  |
| 74ENST00000441717 | JAM3      | 24         | protein_coding | 2.3e-02    | 1.01  | 1.3e-01    | 0.71  | -0.31    | Y-  |
| 74ENST00000506073 | TXK       | 10         | protein_coding | 1.7e-02    | 1.01  | 1.3e-01    | 0.63  | -0.38    | YY  |
| 74ENST00000361507 | GAB2      | 30         | protein_coding | 3.9e-02    | 1.01  | 1.7e-01    | 0.74  | -0.27    | Y-  |
| 74ENST00000384596 | Y_RNA     | 25         | misc_RNA       | 2.7e-02    | -1.01 | 6.6e-02    | -0.95 | 0.05     | -   |
| 74ENST00000404843 | ASXL2     | 22         | protein_coding | 1.8e-02    | 1.00  | 6.2e-02    | 0.84  | -0.16    | -   |
| 74ENST0000055638  | TMEM229B  | 9          | protein_coding | 4.9e-02    | -1.00 | 1.6e-01    | -0.80 | 0.20     | -   |

**Supplementary Table S2:** Significantly differentially expressed genes between 6 hours DEX and EtHO treated cells. Values for DEX and PRED treatments are shown in columns with suffix *D* and *P*, respectively. Column *M.PvsD* displays the difference in GC-regulation between PRED and DEX treatment. Column GBR contains ChIP-chip determined GR-DNA interaction information from [5] (with *YY* and *Y-* indicating an identified GR-DNA interaction in their promoter region of the gene with or without the presence of a GR-response element, respectively; - represents genes without a GR-DNA interaction and an empty cell is shown for genes that could not be detected by ChIP-chip. Genes not highlighted have been found significantly regulated by DEX as well as PRED treatment. Blue coloring highlights genes which don't meet the regulation ( $|M| > 1$ ), but satisfy the significance cut-off ( $p_{BH} < 0.05$ ) in PRED treated samples. Green indicates genes which don't meet the significance cut-off ( $p_{BH} < 0.05$ ) while passing the regulation cut-off in PRED treatment. Red coloring indicates genes which are not significantly regulated upon PRED exposure (i.e. have an  $|M| < 1$  and a  $p_{BH} > 0.05$ ).

| Probe set ID      | Gene name    | No. probes | Gene biotype   | $p_{BH}.D$ | $M.D$ | $p_{BH}.P$ | $M.P$ | $M.PvsD$ | GBR |
|-------------------|--------------|------------|----------------|------------|-------|------------|-------|----------|-----|
| 74ENST00000540964 | TLR5         | 24         | protein_coding | 6.1e-03    | 1.56  | 1.5e-01    | 0.69  | -0.86    | -   |
| 74ENST00000489474 | RPS18        | 4          | protein_coding | 3.6e-02    | -1.31 | 3.6e-01    | -0.57 | 0.74     | -   |
| 74ENST00000581301 | MRM1         | 7          | protein_coding | 3.2e-02    | -1.23 | 2.5e-01    | -0.65 | 0.58     | -   |
| 74ENST00000428982 | SYNGAP1      | 22         | protein_coding | 1.6e-02    | 1.17  | 1.8e-01    | 0.61  | -0.56    | -   |
| 74ENST00000393409 | PLXNA1       | 36         | protein_coding | 1.3e-02    | 1.15  | 3.0e-01    | 0.41  | -0.75    | -   |
| 74ENST00000515965 | RNU6-377P    | 24         | snRNA          | 1.9e-02    | -1.13 | 1.9e-01    | -0.59 | 0.55     | -   |
| 74ENST00000391143 | SNORA48      | 25         | snoRNA         | 2.3e-02    | -1.12 | 1.7e-01    | -0.69 | 0.43     | -   |
| 74ENST00000416587 | RNF144A      | 9          | protein_coding | 2.6e-02    | 1.11  | 2.0e-01    | 0.62  | -0.49    | -   |
| 74ENST00000461853 | RN7SL173P    | 25         | misc_RNA       | 9.1e-03    | -1.11 | 5.1e-01    | -0.23 | 0.88     | -   |
| 74ENST00000381293 | IL6ST        | 13         | protein_coding | 7.7e-03    | 1.09  | 1.7e-01    | 0.48  | -0.61    | -   |
| 74ENST00000543175 | PTRH1        | 18         | protein_coding | 2.1e-02    | 1.09  | 2.0e-01    | 0.58  | -0.51    | -   |
| 74ENST00000371222 | JUN          | 32         | protein_coding | 9.7e-03    | 1.09  | 1.1e-01    | 0.65  | -0.44    | -   |
| 74ENST00000330777 | SGK223       | 30         | protein_coding | 1.6e-02    | 1.08  | 1.2e-01    | 0.67  | -0.41    | -   |
| 74ENST00000544928 | AL021707.2   | 3          | pseudogene     | 2.9e-02    | -1.07 | 3.7e-01    | -0.43 | 0.65     | -   |
| 74ENST00000395071 | SYNGAP1      | 27         | protein_coding | 2.0e-02    | 1.07  | 1.5e-01    | 0.66  | -0.41    | -   |
| 74ENST00000365352 | Y_RNA        | 24         | misc_RNA       | 2.1e-02    | -1.06 | 4.2e-01    | -0.34 | 0.72     | -   |
| 74ENST00000374557 | EPB41LAB     | 21         | protein_coding | 1.4e-02    | 1.06  | 1.5e-01    | 0.58  | -0.48    | -   |
| 74ENST00000404926 | RP3-415N12.1 | 14         | pseudogene     | 4.1e-02    | -1.05 | 5.0e-01    | -0.35 | 0.71     | -   |
| 74ENST00000602634 | TSNAX-DISC1  | 49         | protein_coding | 1.6e-02    | 1.05  | 1.2e-01    | 0.69  | -0.36    | -   |
| 74ENST00000581082 | PER1         | 30         | protein_coding | 2.0e-02    | 1.04  | 1.4e-01    | 0.66  | -0.38    | YY  |
| 74ENST00000506073 | TXK          | 10         | protein_coding | 1.7e-02    | 1.01  | 1.3e-01    | 0.63  | -0.38    | YY  |

**Supplementary Table S3:** Significantly differentially expressed genes between DEX and EtOH treated cells, which are regulated with an absolute M-value smaller than 0.7 by PRED treatment.

| Probe set ID      | Gene name | No. probe | Gene biotype   | $p_{BH}.D$ | $M.D$ | $p_{BH}.P.low$ | $M.P.low$ | $p_{BH}.P.high$ | $M.P.high$ |
|-------------------|-----------|-----------|----------------|------------|-------|----------------|-----------|-----------------|------------|
| 74ENST00000342210 | TLR5      | 21        | protein_coding | 4.0e-02    | 0.59  | 4.4e-01        | 0.29      | 2.2e-01         | 0.27       |
| 74ENST00000489474 | RPS18     | 4         | protein_coding | 6.7e-01    | -0.29 | 2.5e-01        | -0.87     | 9.9e-01         | -0.00      |
| 74ENST00000581301 | MRM1      | 7         | protein_coding | 9.3e-01    | -0.04 | 3.8e-01        | -0.33     | 9.8e-02         | -0.39      |
| 74ENST00000428982 | SYNGAP1   | 22        | protein_coding | 4.9e-01    | 0.27  | 5.5e-01        | 0.31      | 2.8e-01         | 0.30       |
| 74ENST00000393409 | PLXNA1    | 36        | protein_coding | 7.7e-03    | 1.10  | 5.3e-01        | 0.34      | 1.5e-02         | 0.99       |
| 74ENST00000515965 | RNU6-377P | 24        | snRNA          | 4.2e-01    | -0.24 | 8.0e-01        | -0.12     | 7.9e-01         | 0.06       |

| Probe set ID      | Gene name    | No. probe | Gene biotype   | $p_{BH}.D$ | $M.D$ | $p_{BH}.P.low$ | $M.P.low$ | $p_{BH}.P.high$ | $M.P.high$ |
|-------------------|--------------|-----------|----------------|------------|-------|----------------|-----------|-----------------|------------|
| 74ENST00000391143 | SNORA48      | 25        | snoRNA         | 4.3e-01    | -0.29 | 9.1e-01        | -0.07     | 8.4e-02         | -0.49      |
| 74ENST00000416587 | RNF144A      | 9         | protein_coding | 4.9e-02    | 0.73  | 1.6e-01        | 0.65      | 1.1e-01         | 0.49       |
| 74ENST00000461853 | RN7SL173P    | 25        | misc_RNA       | 5.4e-01    | -0.17 | 4.7e-01        | -0.25     | 3.0e-01         | 0.20       |
| 74ENST00000381293 | IL6ST        | 13        | protein_coding | 1.1e-02    | 1.13  | 1.2e-01        | 0.82      | 2.0e-01         | 0.42       |
| 74ENST00000543175 | PTRH1        | 18        | protein_coding | 3.7e-02    | 0.67  | 5.2e-01        | 0.28      | 5.0e-02         | 0.56       |
| 74ENST00000371222 | JUN          | 32        | protein_coding | 4.2e-04    | 1.42  | 7.5e-02        | 0.70      | 2.2e-02         | 0.72       |
| 74ENST00000330777 | SGK223       | 30        | protein_coding | 5.2e-02    | 0.65  | 3.9e-01        | 0.37      | 4.6e-02         | 0.60       |
| 74ENST00000544928 | AL021707.2   | 3         | pseudogene     | 6.1e-01    | -0.30 | 1.4e-01        | -0.97     | 7.1e-01         | 0.16       |
| 74ENST00000395071 | SYNGAP1      | 27        | protein_coding | 5.3e-01    | 0.24  | 5.9e-01        | 0.27      | 3.5e-01         | 0.25       |
| 74ENST00000365352 | Y_RNA        | 24        | misc_RNA       | 3.7e-01    | 0.28  | 3.3e-01        | 0.38      | 6.8e-01         | 0.10       |
| 74ENST00000374557 | EPB41L4B     | 21        | protein_coding | 9.7e-01    | -0.02 | 6.4e-01        | -0.21     | 7.6e-01         | 0.08       |
| 74ENST00000404926 | RP3-415N12.1 | 14        | pseudogene     | 9.8e-01    | -0.02 | 8.9e-01        | -0.15     | 4.9e-01         | -0.31      |
| 74ENST00000602885 | TSNAX-DISC1  | 45        | protein_coding | 4.2e-03    | 1.24  | 2.2e-01        | 0.63      | 7.7e-02         | 0.59       |
| 74ENST00000317276 | PER1         | 32        | protein_coding | 3.7e-02    | 0.80  | 3.3e-01        | 0.49      | 1.5e-02         | 0.96       |
| 74ENST00000506073 | TXK          | 10        | protein_coding | 9.3e-01    | 0.07  | 9.8e-01        | -0.03     | 4.6e-01         | -0.30      |

**Supplementary Table S4:** GC-regulation of significantly differentially expressed genes between DEX and EtOH treated cells regulated with an absolute M-value smaller than 0.7 by PRED treatment in a second microarray data set with DEX treated C7H2 cells and C7H2 cells treated with two different concentrations of the water soluble prednisolone Solu-dacortin [prednisolone 21-(sodium succinate)]. Columns with suffix *D* contain values for DEX treated samples, *P.low* and *P.high* values for 4.0 and 8.0e-6M Solu-dacortin.

| Ensembl Gene ID | Gene name | No. probes | $p_{BH}.D$ | $M.D$ | $p_{BH}.P$ | $M.P$ | GBR |
|-----------------|-----------|------------|------------|-------|------------|-------|-----|
| ENSG00000157514 | TSC22D3   | 14         | 2.1e-05    | 6.21  | 2.6e-05    | 6.06  | YY  |
| ENSG00000185338 | SOCS1     | 16         | 1.4e-04    | 3.52  | 6.3e-04    | 2.89  | YY  |
| ENSG00000159200 | RCAN1     | 14         | 1.0e-03    | 2.45  | 7.5e-03    | 1.85  | YY  |
| ENSG00000096060 | FKBP5     | 17         | 5.6e-04    | 2.11  | 7.8e-04    | 2.11  | YY  |
| ENSG00000113580 | NR3C1     | 17         | 9.8e-04    | 1.54  | 1.2e-03    | 1.55  | -   |
| ENSG00000168209 | DDIT4     | 30         | 6.0e-03    | 1.32  | 1.3e-02    | 1.25  | -   |

**Supplementary Table S5:** GC-regulation of some known GR target genes. Values for DEX and PRED treatments are shown in columns with suffix *D* and *P*, respectively. Column GBR contains ChIP-chip determined GR-DNA interaction information from [5] (with *YY* and *Y*- indicating an identified GR-DNA interaction in their promoter region of the gene with or without the presence of a GR-response element, respectively; - represents genes without a GR-DNA interaction and an empty cell is shown for genes that could not be detected by ChIP-chip.

# Bibliography

- (1) B. Oppl, A. Kofler, S. Schwarz, J. Rainer and R. Kofler, *Wiener klinische Wochenschrift*, Apr. 2011, **123**, 222–229.
- (2) J. L. McNeer and J. B. Nachman, *British journal of haematology*, June 2010, **149**, 638–652.
- (3) G. J. L. Kaspers, G. J. Kaspers, A. J. P. Veerman, A. J. Veerman, C Popp-Snijders, M Lomecky, C. H. Van Zantwijk, L. M. J. W. Swinkels, L. M. Swinkels, E. R. Van Wering and R Pieters, *Medical and Pediatric Oncology*, Aug. 1996, **27**, 114–121.
- (4) J Styczyński, M Wysocki, W Balwierz, R Rokicka-Milewska, M Matysiak, A Balcerska, A Kowalczyk, J Wachowiak, D Sońta-Jakimczyk and A Chybicka, *Neoplasma*, 2002, **49**, 178–183.
- (5) J. Rainer, J. Lelong, D. Bindreither, C. Mantinger, C. Ploner, S. Geley and R. Kofler, *Molecular endocrinology (Baltimore, Md)*, Jan. 2012, **26**, 178–193.
