# Supplementary material for: The synthetic glucocorticoids prednisolone and dexamethasone regulate the same genes in acute lymphoblastic leukemia cells
Source: Springer Nature journal article supplement (doi:10.1186/1471-2164-15-662), 2014-08-07

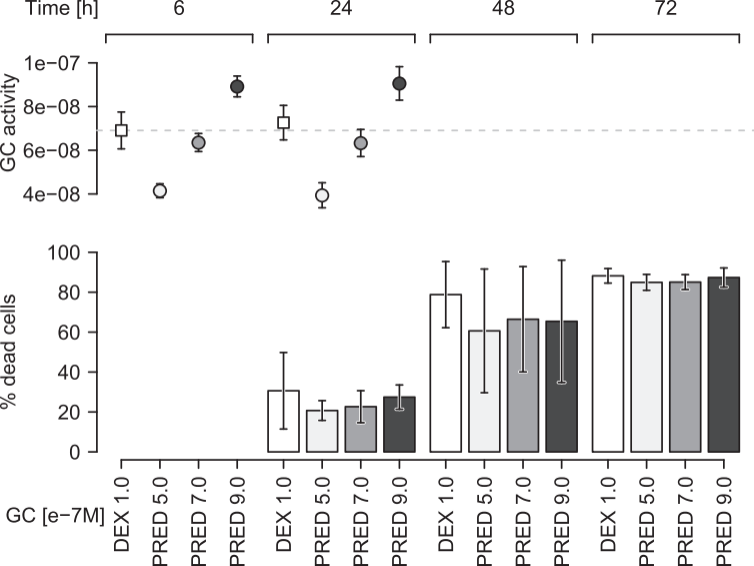

Supplement: 12864_2014_6349_MOESM2_ESM.pdf [file 12864_2014_6349_MOESM2_ESM.pdf]
