# Supplementary material for: The synthetic glucocorticoids prednisolone and dexamethasone regulate the same genes in acute lymphoblastic leukemia cells
Source: Springer Nature journal article supplement (doi:10.1186/1471-2164-15-662), 2014-08-07

Time [h]

6

24

M

3.0  
2.5  
2.0  
1.5  
1.0  
0.5  
0.0

DEX 1.0

PRED 5.0

PRED 7.0

PRED 9.0

DEX 1.0

PRED 5.0

PRED 7.0

PRED 9.0

GC [e-7M]

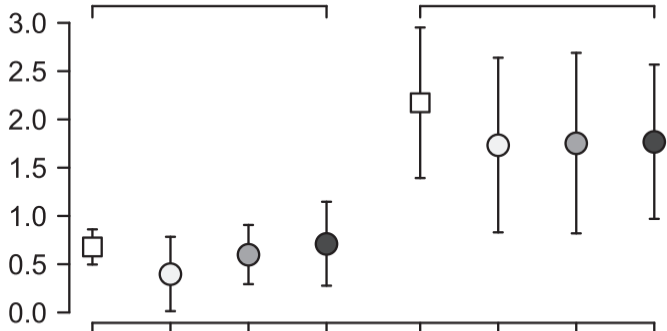

Supplement: 12864_2014_6349_MOESM5_ESM.pdf [file 12864_2014_6349_MOESM5_ESM.pdf]
